# Supplementary material for: BACE1 in PV interneuron tunes hippocampal CA1 local circuits and resets priming of fear memory extinction
Source: Research Square preprint supplement (doi:10.21203/rs.3.rs-2017936/v1), 2022-10-06
Supplement: Supplementary file 1 [file 7a7137c45ab79196f5753acc.xlsx]

## Sheet: Sheet1
Figure number	Test	n		Descriptive stats		P value	Degrees of freedom & F/t/z/R/etc value
		Value	Define	Report	Value
Fig3D	Two-way ANOVA (with Bonferroni's multiple comparison test)	14,21	cells/group	mean ± SEM	Ai9;PV-Cre, BACE1fl/fl;Ai9;PV-Cre 20: 0 ± 0; 0 ± 0, 40: 2.857 ± 2.565; 2.857 ± 1.192, 60: 7.571 ± 4.85; 10.571 ± 3.172, 80: 15.143 ± 6.441; 19.714 ± 4.88, 100: 23.429 ± 7.47; 30.19 ± 6.278, 120: 33.571 ± 8.64; 40.762 ± 7.472, 140: 45.571 ± 7.727; 47.333 ± 7.729, 160: 54.143 ± 6.933; 58.095 ± 6.929, 180: 61.000 ± 6.860; 71.714 ± 6.255, 200: 67.143 ± 5.962; 81.810 ± 6.116,	20: 40: P>0.9999, 60: P>0.9999, 80: P>0.9999, 100: P>0.9999, 120: P>0.9999, 140: P>0.9999, 160: P>0.9999, 180: P>0.9999, 200: P>0.9999,	F (10, 330) = 0.7194, P=0.7062 (genotype x current injected interaction), F (1, 33) = 0.5951, P=0.4459 (genotype)
Fig3E	Unpaired t test (two-tailed)	21,19	cells/group	mean ± SEM	64.48 ± 1.192; 65.58 ± 1.597	P=0.5788	t(38)=0.5600
Fig3F	Mann-Whitney test (two-tailed)	21,19	cells/group	mean ± SEM	137.4 ± 14.25; 155.0 ± 18.42	P=0.4855	U = 173 Sum of ranks: 404, 416
Fig3H	Unpaired t test (two-tailed)	21,19	cells/group	mean ± SEM	300.9 ± 33.46; 305.5 ± 37.45	P=0.9270	t(38)=0.09222
Fig4B	Two-way ANOVA (with Bonferroni's multiple comparison test)	18,18	cells/group	mean ± SEM	Ai9;PV-Cre, BACE1fl/fl;Ai9;PV-Cre 10: 6.757 ± 3.076; 3.157 ± 1.527, 20: 58.334 ± 16.083; 49.141 ± 14.654, 30: 151.108 ± 28.512; 121.655 ± 34.644, 40: 224.032 ± 33.526; 196.204 ± 40.027, 50: 327.69 ± 44.531; 255.516 ± 44.439, 60: 407.997 ± 56.167; 367.411 ± 60.421, 70: 462.674 ± 55.821; 430.668 ± 64.761, 80: 529.405 ± 69.864; 488.610 ± 74.871, 90: 609.496 ± 81.602; 564.196 ± 83.867, 100: 638.292 ±…	10: P>0.9999, 20: P>0.9999, 30: P>0.9999, 40: P>0.9999, 50: P>0.9999, 60: P>0.9999, 70: P>0.9999, 80: P>0.9999, 90: P>0.9999, 100: P>0.9999,	F (9, 306) = 0.1736, P=0.9965 (genotype x stimulus intensity interaction), F (1, 34) = 0.2343, P=0.6315 (genotype)
Fig4D	Mann-Whitney test (two-tailed)	18,18	cells/group	mean ± SEM	7.423 ± 1.043; 7.273 ± 1.001	p>0.9999	U = 162 Sum of ranks: 333, 333
Fig4E	Two-way ANOVA (with Bonferroni's multiple comparison test)	18,18	cells/group	mean ± SEM	Ai9;PV-Cre, BACE1fl/fl;Ai9;PV-Cre 20: 1.73 ± 0.088; 1.971 ± 0.146, 50: 1.517 ± 0.067; 1.489 ± 0.036, 100: 1.364 ± 0.056; 1.367 ± 0.059, 200: 1.092 ± 0.025; 1.131 ± 0.036,	20: P=0.6708 50: P>0.9999, 100: P>0.9999, 200: P>0.9999	F (3, 102) = 0.1736, P=0.1246 (genotype x interstimulus interval interaction), F (1, 34) = 0.7874, P=0.3811 (genotype)
Fig4G	Mann-Whitney test (two-tailed)	18,17	cells/group	mean ± SEM	0.1427 ± 0.02801; 0.1281 ± 0.02192	p = 0.9092	U = 149 Sum of ranks: 328, 302
Fig4H	Mann-Whitney test (two-tailed)	18,17	cells/group	mean ± SEM	1.089±0.1351; 0.9503 ±0.09863	p = 0.6132	U =137 Sum of ranks: 340, 290
Fig4I	Mann-Whitney test (two-tailed)	18,17	cells/group	mean ± SEM	7.397± 0.6838; 7.159 ± 0.6873	p = 0.9092	U =149 Sum of ranks: 328, 302
Fig4K	Two-way ANOVA (with Bonferroni's multiple comparison test)	15,12	cells/group	mean ± SEM	Ai9;PV-Cre, BACE1fl/fl;Ai9;PV-Cre 2.5: 14.061 ± 3.034; 12.724 ± 3.972, 5.0: 24.097 ± 5.870; 29.349 ± 7.853, 7.5: 36.178 ± 7.552; 66.867 ± 17.193, 10.0: 47.822 ± 10.423; 89.991 ± 18.815, 12.5: 58.443 ± 9.836; 108.557 ± 18.052, 15.0: 65.588 ± 9.390; 136.508 ± 21.394, 17.5: 74.021 ± 9.958; 147.267 ± 22.454, 20.0: 80.157 ± 11.109; 161.338 ± 22.491,	2.5: P>0.9999, 5.0: P>0.9999, 7.5: P=0.8071 10.0: P=0.1968 12.5: P=0.0617 15.0: **P=0.0015 17.5: ***P=0.0009 20.0: ***P=0.0002	F (7, 175) = 7.961, ****P<0.0001 (genotype x stimulus intensity interaction), F (1, 25) = 8.047, **P=0.0089 (genotype)
Fig4L	Welch's t test (two-tailed)	15,12	cells/group	mean ± SEM	80.16 ± 11.11; 161.3 ± 22.49,	**P=0.0051	t(16.26) = 3.236
Fig4N	Two-way ANOVA (with Bonferroni's multiple comparison test)	12,16	cells/group	mean ± SEM	Ai9;PV-Cre, BACE1fl/fl;Ai9;PV-Cre Vm=-60: -0.3034 ± 0.04626; -0.3884 ± 0.04779, Vm=-50: -0.3875 ± 0.06117; -0.4343 ± 0.04774, Vm=-40: -0.3505 ± 0.08806; -0.589 ± 0.09002, Vm=-30: -0.3899 ± 0.08999; -0.5872 ± 0.0894, Vm=-20: -0.3546 ± 0.09935; -0.5269 ± 0.1057, Vm=-10: -0.2956 ± 0.1306; -0.4664 ± 0.08324, Vm=0: -0.08957 ± 0.1331; -0.2371 ± 0.09596, Vm=10: 0.1152 ± 0.1197; -0.01281 ± 0.1019, Vm=20:…	Vm=-60: P>0.9999, Vm=-50: P>0.9999, Vm=-40: P=0.7658, Vm=-30: P>0.9999, Vm=-20: P>0.9999, Vm=-10: P>0.9999, Vm=0: P>0.9999, Vm=10: P>0.9999, Vm=20: P>0.9999, Vm=30: P>0.9999, Vm=40:	F (10, 260) = 0.7143, p =0.7108 (genotype x normalized current interaction), F (1, 26) = 1.86, p = 0.1843 (genotype)
Fig5D	Paired t test (two-tailed)	5	cells/group	mean ± SEM	Before MK-801 treatment: 96.00 ± 8.246; After MK-801 treatment (5 min): 90.8 ± 19.12; After MK-801 treatment (20 min): 62.00 ± 22.92;	After MK-801 treatment (5 min) vs. Before MK-801 treatment: p = 0.7727; After MK-801 treatment (20 min) vs. Before MK-801 treatment: p = 0.1498	After MK-801 treatment (5 min) vs. Before MK-801 treatment: t(4) = 0.3091 After MK-801 treatment (20 min) vs. Before MK-801 treatment: t(4) = 1.779
Fig5F	Paired t test (two-tailed)	5	cells/group	mean ± SEM	Before MK-801 treatment: 79.2 ± 17.79; After MK-801 treatment (5 min): 38.4 ± 14.8; After MK-801 treatment (20 min): 14.4 ± 6.274;	After MK-801 treatment (5 min) vs. Before MK-801 treatment: p = 0.1316; After MK-801 treatment (20 min) vs. Before MK-801 treatment: *p = 0.0336	After MK-801 treatment (5 min) vs. Before MK-801 treatment: t(4) = 1.891 After MK-801 treatment (20 min) vs. Before MK-801 treatment: t(4) = 3.179
Fig5H	Two-way ANOVA (with Bonferroni's multiple comparisons test)	8,8	cells/group	mean ± SEM	Stimulus number Ai9;PV-Cre, BACE1fl/fl;Ai9;PV-Cre 1: 100 ± 0; 100 ± 0, 2: 98.750 ± 1.250; 98.750 ± 1.250, 3: 99.166± 0.834; 98.334 ± 1.666, 4: 96.250 ± 3.098; 96.875 ± 3.125, 5: 95.500 ± 2.97; 95.000 ± 5.000, 6: 95.000 ± 3.333; 95.000 ± 5.000, 7: 94.643 ± 3.758; 95.358 ± 4.643, 8: 92.813 ± 4.758; 95.313 ± 4.688, 9: 93.334 ± 4.444; 95.555 ± 4.445, 10: 94.000 ± 4.000; 95.250 ± 4.750, 11: 93.183 ± 4…	1: 2: p>0.9999 3: p>0.9999 4: p>0.9999 5: p>0.9999 6: p>0.9999 7: p>0.9999 8: p>0.9999 9: p>0.9999 10: p>0.9999 11: p>0.9999 12: p>0.9999 13: p>0.9999 14: p>0.9999 15: p>0.9999 16: p>0.9999 17: p>0.9999 18: p>0.9999 19: p>0.9999 20: p>0.9999	F (19, 266) = 0.2116, p=0.9999 (genotype x stimulus number interaction), F (1, 14) = 0.02145, p = 0.8857 (genotype)
Fig5I	Two-way ANOVA (with Bonferroni's multiple comparisons test)	8,8	cells/group	mean ± SEM	Stimulus number Ai9;PV-Cre, BACE1fl/fl;Ai9;PV-Cre 1: 100 ± 0; 100 ± 0, 2: 100 ± 0; 96.875 ± 3.125, 3: 100 ± 0; 93.750 ± 6.250, 4: 99.219 ± 0.781; 92.188 ± 7.813, 5: 97.750 ± 1.485; 91.250 ± 8.750, 6: 96.668 ± 1.636; 91.666 ± 8.334, 7: 94.195 ± 2.859; 91.071 ± 8.929, 8: 93.829 ± 3.148; 91.406 ± 8.594, 9: 92.916 ± 3.501; 90.695 ± 8.992, 10: 91.125 ± 4.373; 90.125 ± 9.309, 11: 90.228 ± 4.967; 89.659…	1: 2: p>0.9999 3: p>0.9999 4: p>0.9991 5: p>0.9999 6: p>0.9999 7: p>0.9999 8: p>0.9999 9: p>0.9999 10: p>0.9999 11: p>0.9999 12: p>0.9999 13: p>0.9999 14: p>0.9999 15: p>0.9999 16: p>0.9999 17: p>0.9999 18: p>0.9999 19: p>0.9999 20: p>0.9999	F (19, 266) = 0.4425, p=0.9804 (genotype x stimulus number interaction), F (1, 14) = 0.04706, p = 0.8314 (genotype)
Fig5J	Two-way ANOVA (with Bonferroni's multiple comparisons test)	8,8	cells/group	mean ± SEM	Stimulus number Ai9;PV-Cre, BACE1fl/fl;Ai9;PV-Cre 1: 100 ± 0; 100 ± 0, 2: 95.625 ± 3.196; 96.875 ± 3.125, 3: 89.583 ± 6.530; 92.083 ± 6.105, 4: 85.000 ± 7.559; 89.688 ± 7.566, 5: 77.000 ± 8.936; 86.250 ± 8.310, 6: 71.250 ± 10.058; 82.500 ± 7.938, 7: 70.715 ± 10.054; 79.463 ± 8.099, 8: 67.656 ± 10.544; 77.500 ± 7.962, 9: 66.806 ± 10.871; 73.889 ± 8.553, 10: 65.375 ± 11.299; 71.000 ± 8.791, 11: 63.…	1: 2: p>0.9999 3: p>0.9999 4: p>0.9999 5: p>0.9999 6: p>0.9999 7: p>0.9999 8: p>0.9999 9: p>0.9999 10: p>0.9999 11: p>0.9999 12: p>0.9999 13: p>0.9999 14: p>0.9999 15: p>0.9999 16: p>0.9999 17: p>0.9999 18: p>0.9999 19: p>0.9999 20: p>0.9999	F (19, 266) = 0.5551, p=0.9344 (genotype x stimulus number interaction), F (1, 14) = 0.05822, p = 0.8128 (genotype)
Fig5K	Two-way ANOVA (with Bonferroni's multiple comparisons test)	3,5	cells/group	mean ± SEM	Stimulus number Ai9;PV-Cre, BACE1fl/fl;Ai9;PV-Cre 1: 100 ± 0; 100 ± 0, 2: 96.667 ± 3.333; 88.000 ± 9.695, 3: 84.447 ± 9.686; 81.332 ± 13.065, 4: 71.667 ± 4.410; 69.000 ± 13.172, 5: 62.667 ± 7.055; 61.600 ± 11.634, 6: 56.663 ± 6.667; 54.002 ± 10.509, 7: 52.380 ± 7.797; 50.288 ± 10.404, 8: 50.000 ± 8.780; 46.500 ± 9.572, 9: 45.927 ± 8.543; 44.444 ± 9.350, 10: 45.333 ± 9.821; 40.400 ± 8.495, 11: 41.…	1: 2: p>0.9999 3: p>0.9999 4: p>0.9999 5: p>0.9999 6: p>0.9999 7: p>0.9999 8: p>0.9999 9: p>0.9999 10: p>0.9999 11: p>0.9999 12: p>0.9999 13: p>0.9999 14: p>0.9999 15: p>0.9999 16: p>0.9999 17: p>0.9999 18: p>0.9999 19: p>0.9999 20: p>0.9999	F (19, 114) = 0.1152, p>0.9999 (genotype x stimulus number interaction), F (1, 6) = 0.08759, p = 0.7772 (genotype)
Fig6B	Unpaired t test (two-tailed)	5,8	cells/group	mean ± SEM	13.2 ± 1.013; 13.16 ± 1.083	p = 0.9790	t(11) = 0.02694
Fig6D	Mann-Whitney test (two-tailed)	16,19	cells/group	mean ± SEM	22.02 ± 2.586; 24.76 ± 2.207	p = 0.0883	U = 100 Sum of ranks: 236, 394
Fig6E	Welch’s t test (two-tailed)	16,19	cells/group	mean ± SEM	0.9083 ± 0.1331; 1.682 ± 0.2584	*p = 0.0131	t(26.57) = 2.661
Fig6H	Two-way ANOVA (with Bonferroni's multiple comparisons test)	16,18	cells/group	mean ± SEM	BACE1fl/fl, BACE1fl/fl;PV-Cre 2.5: 26.863 ± 4.252; 9.933 ± 1.745, 5.0: 75.474 ± 12.207; 36.136 ± 4.453, 7.5: 114.303 ± 12.866; 67.510 ± 6.591, 10.0: 162.171 ± 17.450; 102.339 ± 12.766, 12.5: 189.688 ± 22.055; 126.144 ± 16.241, 15.0: 221.658 ± 25.303; 151.313 ± 19.347, 17.5: 269.708 ± 39.306; 171.817 ± 23.415, 20.0: 306.547 ± 43.487; 192.383 ± 25.760,	2.5: P>0.9999, 5.0: P>0.9999, 7.5: P=0.9092 10.0: P=0.3473 12.5: P=0.2563 15.0: P=0.1419 17.5: **P=0.0082 20.0: **P=0.0011	F (7, 224) = 2.870, **p=0.0069 (genotype x stimulation intensity interaction), F (1, 32) = 7.086, *p = 0.0121 (genotype)
Fig6I	Two-way ANOVA (with Bonferroni's multiple comparisons test)	16,18	cells/group	mean ± SEM	BACE1fl/fl, BACE1fl/fl;PV-Cre 2.5: 137.883 ± 30.012; 44.240 ± 12.944, 5.0: 381.672 ± 48.413; 236.943 ± 30.502, 7.5: 508.780 ± 57.197; 402.868 ± 36.537, 10.0: 610.698 ± 56.768; 510.951 ± 43.636, 12.5: 630.937 ± 62.673; 594.913 ± 53.958, 15.0: 668.497 ± 63.902; 641.839 ± 56.189, 17.5: 685.926 ± 68.154; 688.157 ± 60.723, 20.0: 731.376 ± 71.092; 735.847 ± 60.095,	2.5: P>0.9999, 5.0: P=0.4228, 7.5: P>0.9999 10.0: P>0.9999 12.5: P>0.9999 15.0: P>0.9999 17.5: P>0.9999 20.0: P>0.9999	F (7, 224) = 2.336, *p=0.0255 (genotype x stimulation intensity interaction), F (1, 32) = 0.8925, p = 0.3519 (genotype)
Fig6J	Unpaired t test (two-tailed)	16,18	cells/group	mean ± SEM	2.756 ± 0.2787; 4.347 ± 0.2931	***p = 0.0005	t(32) = 3.907
Fig6L	Two-way ANOVA (with Bonferroni's multiple comparisons test)	19,16	cells/group	mean ± SEM	BACE1fl/fl, BACE1fl/fl;PV-Cre 2.5: 17.445 ± 2.236; 19.143 ± 4.312, 5.0: 41.651 ± 4.994; 51.961 ± 10.240, 7.5: 73.869 ± 8.538; 95.917 ± 17.889, 10.0: 120.477 ± 16.767; 141.491 ± 21.162, 12.5: 165.055 ± 22.623; 202.123 ± 28.589, 15.0: 213.673 ± 25.877; 261.658 ± 36.601, 17.5: 248.504 ± 27.126; 307.680 ± 43.535, 20.0: 285.878 ± 34.848; 348.286 ± 44.202,	2.5: P>0.9999, 5.0: P>0.9999, 7.5: P>0.9999 10.0: P>0.9999 12.5: P>0.9999 15.0: P>0.9999 17.5: P=0.7590 20.0: P=0.6260	F (7, 231) = 2.870, p=0.4297 (genotype x stimulation intensity interaction), F (1, 33) = 1.331, p = 0.2569 (genotype)
Fig6M	Two-way ANOVA (with Bonferroni's multiple comparisons test)	19,16	cells/group	mean ± SEM	BACE1fl/fl, BACE1fl/fl;PV-Cre 2.5: 79.116 ± 16.487; 48.567 ± 14.787, 5.0: 231.082 ± 26.059; 148.924 ± 30.301, 7.5: 370.805 ± 40.067; 259.584 ± 40.427, 10.0: 472.728 ± 44.943; 347.209 ± 51.311, 12.5: 523.281 ± 46.949; 412.923 ± 50.315, 15.0: 626.890 ± 61.854; 475.258 ± 47.874, 17.5: 675.492 ± 68.453; 524.083 ± 62.044, 20.0: 765.131 ± 78.552; 541.504 ± 63.901,	2.5: P>0.9999, 5.0: P>0.9999, 7.5: P=0.9651 10.0: P=0.6402 12.5: P=0.9883 15.0: P=0.2775 17.5: P=0.2797 20.0: *P=0.0155	F (7, 231) = 1.691, p=0.1120 (genotype x stimulation intensity interaction), F (1, 33) = 4.400, *p = 0.0437 (genotype)
Fig6N	Unpaired t test (two-tailed)	19,16	cells/group	mean ± SEM	3.231 ± 0.3922; 1.899 ± 0.2584	*p = 0.0103	t(33) = 2.722
Fig7C	Two-way ANOVA (with Bonferroni's multiple comparisons test)	19,21	cells/group	mean ± SEM	BACE1fl/fl, BACE1fl/fl;PV-Cre 10: 14.384 ± 2.410; 11.082 ± 2.067, 20: 50.308 ± 10.288; 29.828 ± 6.049, 30: 112.840 ± 15.574; 48.997 ± 8.762, 40: 158.268 ± 22.897; 77.586 ± 14.132, 50: 211.480 ± 27.813; 87.141 ± 12.916, 60: 268.146 ± 35.903; 100.600 ± 13.081, 70: 342.093 ± 52.863; 122.422 ± 16.375, 80: 360.684 ± 43.020; 148.724 ± 22.684, 90: 431.465 ± 45.261; 163.174 ± 26.093, 100: 482.197 ± 51.79…	10: P>0.9999, 20: P=0.9667, 30: *P=0.0128, 40: P=0.0537, 50: **P=0.0042, 60: **P=0.0022, 70: **P=0.0068, 80: **P=0.0017, 90: ***P=0.0002, 100: ***P=0.0002,	F (9, 342) = 15.21, p<0.0001 (genotype x stimulation intensity interaction), F (1, 38) = 26.50, ****p<0.0001 (genotype)
Fig7D	Mann-Whitney test (two-tailed)	19,21	cells/group	mean ± SEM	5.101 ± 0.5501; 1.874 ± 0.3276	****p<0.0001	U =52 Sum of ranks: 537, 283
Fig7F	Two-way ANOVA (with Bonferroni's multiple comparisons test)	17,17	cells/group	mean ± SEM	BACE1fl/fl, BACE1fl/fl;PV-Cre 20: 2.290 ± 0.139; 2.596 ± 0.186, 50: 1.962 ± 0.106; 1.953 ± 0.123, 100: 1.601 ± 0.082; 1.546 ± 0.080, 200: 1.287 ± 0.043; 1.153 ± 0.052,	20: P=0.7919, 50: P>0.9999, 100: p>0.9999, 200: P=0.2227	F (3, 96) = 2.100, p=0.1053 (genotype x interstimulus interval interaction), F (1, 32) = 0.06461, p=0.8010 (genotype)
Fig7I	Two-way ANOVA (with Bonferroni's multiple comparisons test)	17, 13	cells/group	mean ± SEM	BACE1fl/fl, BACE1fl/fl;PV-Cre 2.5: 22.057 ± 3.729; 25.748 ± 6.346, 5.0: 53.146 ± 9.097; 78.133 ± 13.186, 7.5: 91.816 ± 14.435; 138.618 ± 22.070, 10.0: 136.149 ± 19.117; 213.413 ± 33.890, 12.5: 187.866 ± 25.627; 294.785 ± 50.003, 15.0: 250.516 ± 35.380; 379.274 ± 63.885, 17.5: 294.183 ± 41.435; 433.217 ± 75.341, 20.0: 349.613 ± 45.699; 513.843 ± 80.047,	2.5: P>0.9999, 5.0: P>0.9999, 7.5: P>0.9999, 10.0: P>0.9999, 12.5: P=0.4149, 15.0: P=0.1555, 17.5: P=0.0936 20.0: *P=0.0239	F (7, 196) = 2.848, **p=0.0075 (genotype x stimulation intensity interaction), F (1, 28) = 3.797, p=0.0614 (genotype)
Fig7J	Mann-Whitney test (two-tailed)	17, 13	cells/group	mean ± SEM	19.17 ± 2.668; 28.55 ± 5.045	p = 0.1569	U =76 Sum of ranks: 229, 236
Fig7L	Two-way ANOVA (with Bonferroni's multiple comparisons test)	13, 13	cells/group	mean ± SEM	BACE1fl/fl, BACE1fl/fl;PV-Cre 20: 2.493 ± 0.092; 2.176 ± 0.135, 50: 1.897 ± 0.060; 2.018 ± 0.099, 100: 1.719 ± 0.069; 1.518 ± 0.079, 200: 1.417 ± 0.053; 1.342 ± 0.057,	20: P=0.2623, 50: P>0.9999, 100: p=0.2716, 200: P>0.9999	F (3, 72) = 5.100, **p=0.003 (genotype x interstimulus interval interaction), F (1, 24) = 1.522, p=0.2292 (genotype)
Fig8D	Two-way ANOVA (with Bonferroni's multiple comparisons test)	15,16,11	cells/group	mean ± SEM	eGFP, BACE1WT-eGFP, BACE1D93A-eGFP 2.5: 27.728±13.419; 14.921±2.909; 29.022±10.424 5.0: 63.128±19.657; 51.683±16.413; 74.156±15.110 7.5: 96.187±26.916; 68.432±17.211; 84.452±18.924 10.0: 129.686±31.671; 78.952±20.630; 109.357±21.077 12.5: 144.741±31.029; 83.594±19.413; 116.379±20.699 15.0: 158.830±33.513; 89.565±21.827; 125.946±24.058 17.5: 158.813±29.111; 89.119±21.191; 133.088±23.794 20.0: 161.…	BACE1WT-eGFP vs. eGFP 2.5: P>0.9999, 5.0: P>0.9999, 7.5: P>0.9999, 10.0: P>0.9999, 12.5: P=0.5191, 15.0: P=0.2937, 17.5: P=0.2846, 20.0: P=0.1976	F (7, 203) = 3.217, **p=0.003 (Treatment x Stimulation intensity interaction), F (1, 29) = 2.470, p=0.1269 (Treatment)
Fig8F	Kruskal-Wallis test/Dunn's multiple comparisons test	15,16,11	cells/group	mean ± SEM	161.730±30.564; 87.201±20.970; 135.657±23.893	BACE1WT-eGFP vs. eGFP: *p=0.0283 BACE1D93A-eGFP vs. eGFP: p>0.9999	BACE1WT-eGFP vs. eGFP: z=2.453 BACE1D93A-eGFP vs. eGFP: z=0.3497
Fig8H	Two-way ANOVA (with Bonferroni's multiple comparisons test)	16,16,11	cells/group	mean ± SEM	eGFP, BACE1WT-eGFP, BACE1D93A-eGFP 10: 5.570±0.741; 22.741±8.155; 2.110±0.708 20: 14.085±4.370; 79.474±26.055; 5.724±1.958 30: 23.756±6.128; 153.017±42.927; 17.214±7.266 40: 31.390±6.704; 222.307±51.501; 42.311±18.757 50: 48.543±9.544; 282.402±50.848; 73.434±34.612 60: 66.508±13.410; 304.294±51.322; 104.411±54.009 70: 90.541±17.247; 349.200±58.515; 105.034±46.556 80: 115.405±20.526; 415.633±73.25…	BACE1WT-eGFP vs. eGFP 10: p=0.5307, 20: p=0.2501, 30: p=0.0901, 40: *p=0.0214, 50:** p=0.0035, 60: **p=0.0033, 70: **p=0.0052, 80: *p=0.0101 90: **p=0.0067 100:*p=0.0151	F (9, 270) = 11.62, ****p<0.0001 (Treatment x Stimulation intensity interaction), F (1, 30) = 17.15, ***p=0.0003 (Treatment)
Fig8I	Kruskal-Wallis test/Dunn's multiple comparisons test	16,16,11	cells/group	mean ± SEM	1.516±0.2962; 5.319±0.9042; 1.763±0.7064	BACE1WT-eGFP vs. eGFP: **p=0.0064 BACE1D93A-eGFP vs. eGFP: p>0.9999	BACE1WT-eGFP vs. eGFP: z=3.069 BACE1D93A-eGFP vs. eGFP: z=0.3535
Fig9D	Two-way ANOVA (with Bonferroni's multiple comparisons test)	6,7,6,5	mice/group	mean ± SEM	Ai9;PV-Cre+DIO-GFP+CNO: Baseline 1.018±0.663; Context 85.005±2.154; New Context 17.767±7.509; Cued Test 74.673±4.941 Ai9;PV-Cre+DIO-hM4Di-GFP+CNO: Baseline 2.724±1.693; Context 83.264±4.305; New Context 19.209±4.809; Cued Test 72.029±8.931 BACE1fl/fl;PV-Cre+DIO-GFP+CNO: Baseline 0.358±0.358; Context 81.963±9.200; New Context 24.815±6.318; Cued Test 75.142±10.669 BACE1fl/fl;PV-Cre+DIO-hM4Di-GFP+CN…	Bonferroni's multiple comparisons test Baseline: p>0.9999 Context: p>0.9999 New Context: p>0.9999 Cued Test: p>0.9999	F (9, 60) = 0.3929, p=0.9339 (Treatment x protocols interaction), F (3, 20) = 1.174, p=0.3446 (Treatment)
Fig9E	Two-way ANOVA (with Bonferroni's multiple comparisons test)	6,7,6,5	mice/group	mean ± SEM	Ai9;PV-Cre+DIO-GFP+CNO: Baseline 1.018±0.663; FC1 30.138±9.982; FC2 44.908±10.483; FC3 58.213±4.827 Ai9;PV-Cre+DIO-hM4Di-GFP+CNO: Baseline 2.724±1.693; FC1 25.937±5.899; FC2 49.397±5.893; FC3 65.819±5.506 BACE1fl/fl;PV-Cre+DIO-GFP+CNO: Baseline 0.358±0.358; FC1 21.370±8.186; FC2 44.693±11.453; FC3 75.917±6.865 BACE1fl/fl;PV-Cre+DIO-hM4Di-GFP+CNO: Baseline 0.196±0.196; FC1 22.580±5.359; FC2 61.834…	Bonferroni's multiple comparisons test All adjusted P values >0.9999, except FC3: BACE1fl/fl;PV-Cre+DIO-GFP+CNO vs. Ai9;PV-Cre+DIO-GFP+CNO, p=0.3852; BACE1fl/fl;PV-Cre+DIO-hM4Di-GFP+CNO vs. Ai9;PV-Cre+DIO-GFP+CNO, p=0.3250	F (9, 60) = 1.148, p=0.3448 (Treatment x protocols interaction), F (3, 20) = 0.2451, p=0.8638 (Treatment)
Fig9F	Two-way ANOVA (with Bonferroni's multiple comparisons test)	6,7,6,5	mice/group	mean ± SEM	Ai9;PV-Cre+DIO-GFP+CNO (Group A): day2 85.005±2.154; day3 46.854±2.800; day4 30.614±5.849; day5 28.015±3.929 Ai9;PV-Cre+DIO-hM4Di-GFP+CNO (Group B): day2 83.264±4.305; day3 61.683±4.675; day4 41.444±8.932; day5 25.868±3.365 BACE1fl/fl;PV-Cre+DIO-GFP+CNO (Group C): day2 81.963±9.200; day3 43.844±3.719; day4 28.624±6.686; day5 15.396±3.934 BACE1fl/fl;PV-Cre+DIO-hM4Di-GFP+CNO (Group D): day2 80.398±…	Bonferroni's multiple comparisons test day2: all adjusted P values >0.9999, day3: Group B vs. Group A, p=0.1337; Group C vs. Group A, p>0.9999; Group D vs. Group A, *p=0.0312; Group C vs. Group B, p=0.0757; Group D vs. Group B, **p=0.0016; Group D vs. Group C, p=0.1011 day4: Group B vs. Group A, p>0.9999; Group C vs. Group A, p>0.9999; Group D vs. Group A, p>0.9999; Group C vs. Group B, p>0.9999;…	F (9, 60) = 1.730, p=0.1017 (Treatment x protocols interaction), F (3, 20) = 3.813, *p=0.0260 (Treatment)

## Sheet: Sheet2
Figure number	Test	n		Descriptive stats		P value	Degrees of freedom & F/t/z/R/etc value
		Value	Define	Report	Value
PN-rm	Mann-Whitney test	17,15	cells/group	mean ± SEM	cko -62 ± 0.9115 po -64.33 ± 1.323	P=0.2093	U（31）=94
PN-in	Unpaired t test	17,15	cells/group	mean ± SEM	cko 245.1 ± 18.97 po 272.8 ± 15.58	P=0.2763	t(30)=1.109
PN-reo	Mann-Whitney test	17,15	cells/group	mean ± SEM	cko 124.7 ± 20.53 po 133.9 ± 20.81	P=0.5822	U（31）=112.5
Fig4D	Unpaired t test (with Welch's correction)	16,19	cells/group	mean ± SEM	cko 0.9083 ± 0.1331 po 1.682 ± 0.2584	P=0.0131	t(26.57)=2.661
Fig4C	Mann-Whitney test	16,19	cells/group	mean ± SEM	cko 22.02 ± 2.586 po 24.76 ± 2.207	P=0.0883	U（34）=100
PN-AP	Two-way ANOVA (with Bonferroni's multiple comparisons test)	17,15	cells/group	mean ± SEM	10:0.3529±0.1906,0.8±0.3266, 20:1.176±0.4869,2.667±0.8204, 30:3.412±0.836,5.333±1.214, 40:6±1.057,7.467±1.33, 50:8.471±0.8665,9.333±1.72, 60:10.12±1.064,11.33±1.641, 70:12.24±1.097,13.47±1.815, 80:14.35±1.115,14.4±1.802, 90:15.18±1.329,16±1.757, 100:16.59±1.391,16.93±1.677, 110:17.75±1.58,17.07±1.584, 120:18.12±1.548,17.73±1.677, 130:19.25±1.806,17.54±1.666, 140:20.71±2.061,18.5±1.459, 150:21.69±…	10:cko vs. po P>0.9999, 20:cko vs. po P>0.9999, 30:cko vs. po P>0.9999, 40:cko vs. po P>0.9999, 50:cko vs. po P>0.9999, 60:cko vs. po P>0.9999, 70:cko vs. po P>0.9999, 80:cko vs. po P>0.9999, 90:cko vs. po P>0.9999, 100:cko vs. po P>0.9999, 110:cko vs. po P>0.9999, 120:cko vs. po P>0.9999, 130:cko vs. po P>0.9999, 140:cko vs. po P>0.9999, 150:cko vs. po P>0.9999, 160:cko vs. po P>0.9999, 170:cko …	F (1.994, 55.45) = 127.2 P<0.0001(genotype), F (1, 30) = 0.002014 P=0.9645(session), F (16, 445) = 1.341 P=0.1681(interaction),
Fig3E	Unpaired t test	24,23	cells/group	mean ± SEM	pa -63.96 ± 1.128 po -64.26 ± 1.475	P=0.8706	t(45)=0.1638
Fig3F	Unpaired t test	24,23	cells/group	mean ± SEM	pa 146.6 ± 13.84 po 154.1 ± 17.13	P=0.7353	t(45)=0.3402
Fig3H	Unpaired t test	24,23	cells/group	mean ± SEM	pa 286 ± 30.86 po 279 ± 33.57	P=0.8791	t(45)=0.1528
Fig3D	Mixed-effects analysis(REML) / Bonferroni's multiple comparision test	24,23	cells/group	mean ± SEM	20:00 ± 0,0.2609 ± 0.1909, 40:1.583 ± 1.499,2.348 ± 1.101, 60:4.833 ± 2.939,6 ± 2.392, 80:9.750 ± 4.399,12.35 ± 3.84, 100:13.833 ± 5.269,19.57 ± 5.193, 120:19.417 ± 6.326,28.35 ± 6.835, 140:25.583 ± 6.704,33.18 ± 7.634, 160:28.174 ± 6.771,42.27 ± 7.685, 180:33.909 ± 7.443,62.84 ± 8.327, 200:40.381 ± 7.766,73.79 ± 8.752,	20:pa vs. po P>0.9999, 40:pa vs. po P>0.9999, 60:pa vs. po P>0.9999, 80:pa vs. po P>0.9999, 100:pa vs. po P>0.9999, 120:pa vs. po P>0.9999, 140:pa vs. po P>0.9999, 160:pa vs. po P= 0.7854, 180:pa vs. po P= 0.0064, 200:pa vs. po P= 0.0007,	F (10, 434) = 55.94P<0.0001(genotype), F (1, 45) = 2.597P=0.114(session), F (10, 434) = 3.962P<0.0001(interaction),
RESCUE-PV-AP(bace1)	Mixed-effects analysis(REML) / Bonferroni's multiple comparision test	11,15	cells/group	mean ± SEM	20:3.818 ± 3.818,1.286 ± 0.8797, 40:12.18 ± 5.948,4.714 ± 1.447, 60:26.36 ± 7.698,6.714 ± 1.835, 80:37.09 ± 8.061,7.846 ± 2.006, 100:49.09 ± 8.551,9.667 ± 2.115, 120:58.36 ± 8.952,15.33 ± 3.493, 140:66 ± 9.26,23.45 ± 4.995, 160:71.45 ± 9.713,28 ± 6.518, 180:75.64 ± 10.07,32 ± 7.625, 200:78.73 ± 10.14,35 ± 7.895,	20:pa vs. po P>0.9999, 40:pa vs. po P>0.9999, 60:pa vs. po P= 0.3318, 80:pa vs. po P= 0.051, 100:pa vs. po P= 0.0098, 120:pa vs. po P= 0.0068, 140:pa vs. po P= 0.0112, 160:pa vs. po P= 0.0187, 180:pa vs. po P= 0.0308, 200:pa vs. po P= 0.0342,	F (1.556, 32.68) = 51.58 P<0.0001(genotype), F (1, 23) = 19.75 P=0.0002(session), F (10, 210) = 9.468 P<0.0001(interaction),
Fig4F	Mixed-effects analysis(REML) / Bonferroni's multiple comparision test	18,18	cells/group	mean ± SEM	0:2.879 ± 1.291,2.98 ± 0.9777, 10:1.8 ± 0.5663,3.443 ± 1.009, 20:2 ± 0.8185,2.637 ± 0.374, 30:1.603 ± 0.3961,2.633 ± 0.4797, 40:1.412 ± 0.2418,2.407 ± 0.2425, 50:1.149 ± 0.1733,2.395 ± 0.289, 60:1.065 ± 0.1531,2.385 ± 0.2732 70:0.9984 ± 0.1429,2.147 ± 0.2971, 80:1.06 ± 0.1496,2.044 ± 0.246, 90:1.026 ± 0.147,1.948 ± 0.2255, 100:1 ± 0.1398,1.901 ± 0.2076,	10:cko vs. po P>0.9999, 20:cko vs. po P>0.9999, 30:cko vs. po P>0.9999, 40:cko vs. po P= 0.0706, 50:cko vs. po P= 0.0104, 60:cko vs. po P= 0.0031, 70:cko vs. po P= 0.0207, 80:cko vs. po P= 0.0214, 90:cko vs. po P= 0.0202, 100:cko vs. po P= 0.0125,	F (2.200, 69.31) = 3.145 P=0.0447(genotype), F (1, 34) = 6.050 P=0.0192(session), F (10, 315) = 0.5432 P=0.8589(interaction),
PN-E	Two-way ANOVA (with Bonferroni's multiple comparisons test)	18,18	cells/group	mean ± SEM	0:7.436 ± 2.138,9.89 ± 2.893, 10:64.18 ± 23.32,50.35 ± 16.28, 20:156 ± 47.3,123.8 ± 25.39, 30:213.2 ± 52.27,206.5 ± 42.02, 40:270.9 ± 59.32,256.6 ± 48.17, 50:341.7 ± 66.05,308 ± 60.96, 60:428.3 ± 74.1,370 ± 71.9, 70:501.2 ± 69.73,403.8 ± 70.92, 80:568.1 ± 75.08,413.6 ± 68.34, 90:600.6 ± 80.27,439.4 ± 68.54, 100:653.3 ± 80.29,455.3 ± 64.72,	10:cko vs. po P>0.9999, 20:cko vs. po P>0.9999, 30:cko vs. po P>0.9999, 40:cko vs. po P>0.9999, 50:cko vs. po P>0.9999, 60:cko vs. po P>0.9999, 70:cko vs. po P>0.9999, 80:cko vs. po P>0.9999, 90:cko vs. po P>0.9999, 100:cko vs. po P=0.698,	F (10, 350) = 2.303 P=0.0125(genotype), F (1.750, 61.25) = 65.16 P<0.0001(session), F (1, 35) = 1.027 P=0.3179(interaction),
PN-I	Mixed-effects analysis(REML) / Bonferroni's multiple comparision test	18,18	cells/group	mean ± SEM	0:12.55 ± 2.389,10.09 ± 2.399, 10:51.15 ± 17.52,87.11 ± 29.39, 20:170.7 ± 49.32,245.7 ± 58.8, 30:228.2 ± 65.07,336 ± 68.93, 40:267.7 ± 68.16,418.2 ± 71.63, 50:303.1 ± 70.86,470.6 ± 79.91, 60:338.4 ± 72.61,546.5 ± 85.87, 70:365.8 ± 75.57,579 ± 94.6, 80:416.1 ± 78.5,584.6 ± 92.94, 90:439.4 ± 86.09,603.8 ± 94.48, 100:460.3 ± 83.86,619.6 ± 92.7,	10:cko vs. po >0.9999, 20:cko vs. po >0.9999, 30:cko vs. po >0.9999, 40:cko vs. po >0.9999, 50:cko vs. po >0.9999, 60:cko vs. po = 0.8041, 70:cko vs. po = 0.9639, 80:cko vs. po >0.9999, 90:cko vs. po >0.9999, 100:cko vs. po >0.9999,	F (1.633, 57.00) = 54.38 P<0.0001(genotype), F (1, 35) = 2.180 P=0.1488(session), F (10, 349) = 2.039 P=0.0289(interaction),
Fig8C	Mixed-effects analysis(REML) / Bonferroni's multiple comparision test	17,17	cells/group	mean ± SEM	0:0.4854 ± 0.07306,0.4345 ± 0.2268, 10:0.6429 ± 0.1896,0.8261 ± 0.2366, 20:1.295 ± 0.3406,0.5798 ± 0.2506, 30:1.208 ± 0.3026,0.8708 ± 0.1646, 40:1.659 ± 0.3933,1.016 ± 0.2573, 50:1.218 ± 0.1836,0.6954 ± 0.09124, 60:1.31 ± 0.2736,0.7189 ± 0.1129, 70:1.145 ± 0.1498,0.6844 ± 0.08177, 80:1.218 ± 0.1536,0.6102 ± 0.06538, 90:1.035 ± 0.1031,0.5926 ± 0.06419, 100:1 ± 0.1087,0.5935 ± 0.06178,	10:egfp vs. bace1-egfp P>0.9999, 20:egfp vs. bace1-egfp P>0.9999, 30:egfp vs. bace1-egfp P>0.9999, 40:egfp vs. bace1-egfp P>0.9999, 50:egfp vs. bace1-egfp P= 0.1955, 60:egfp vs. bace1-egfp P= 0.6556, 70:egfp vs. bace1-egfp P= 0.1398, 80:egfp vs. bace1-egfp P= 0.0175, 90:egfp vs. bace1-egfp P= 0.0135, 100:egfp vs. bace1-egfp P= 0.0379,	F (4.658, 144.9) = 2.851 P=0.0199(genotype), F (1, 32) = 7.917 P=0.0083(session), F (10, 311) = 1.051 P=0.4(interaction),
RESCUE-PN-IE(Dbace1)	Mixed-effects analysis(REML) / Bonferroni's multiple comparision test	12,13	cells/group	mean ± SEM	10:1.244 ± 0.2675,1.058 ± 0.3154, 20:1.885 ± 0.3386,2.142 ± 0.4219, 30:1.491 ± 0.07724,1.765 ± 0.256, 40:1.334 ± 0.08991,1.429 ± 0.1073, 50:1.233 ± 0.08651,1.307 ± 0.1334, 60:1.183 ± 0.07995,1.184 ± 0.1359, 70:1.149 ± 0.08191,1.139 ± 0.1124, 80:1.134 ± 0.07812,1.106 ± 0.1254, 90:1.116 ± 0.08171,1.123 ± 0.1169, 100:1 ± 0.058,1.016 ± 0.1037,	10:egfp vs.Dbace1-egfp P>0.9999， 20:egfp vs.Dbace1-egfp P>0.9999 30:egfp vs.Dbace1-egfp P>0.9999 40:egfp vs.Dbace1-egfp P>0.9999 50:egfp vs.Dbace1-egfp P>0.9999 60:egfp vs.Dbace1-egfp P>0.9999 70:egfp vs.Dbace1-egfp P>0.9999 80:egfp vs.Dbace1-egfp P>0.9999 90:egfp vs.Dbace1-egfp P>0.9999 100:egfp vs.Dbace1-egfp P>0.9999	F (2.893, 64.94) = 9.032 P=<0.0001(genotype), F (1, 23) = 0.6363 P=0.4332(session), F (9, 202) = 0.5711 P=0.8199(interaction),
Fig5B	Two-way ANOVA (with Bonferroni's multiple comparisons test)	18,18	cells/group	mean ± SEM	10:6.757 ± 3.076,3.157 ± 1.527, 20:58.33 ± 16.08,49.14 ± 14.65, 30:151.1 ± 28.51,121.7 ± 34.64, 40:224 ± 33.53,196.2 ± 40.03, 50:327.7 ± 44.53,255.5 ± 44.44, 60:408 ± 56.17,367.4 ± 60.42, 70:462.7 ± 55.82,430.7 ± 64.76, 80:529.4 ± 69.86,488.6 ± 74.87, 90:609.5 ± 81.6,564.2 ± 83.87, 100:638.3 ± 87.94,618.7 ± 92.16,	10:pa vs. po P>0.9999, 20:pa vs. po P>0.9999, 30:pa vs. po P>0.9999, 40:pa vs. po P>0.9999, 50:pa vs. po P>0.9999, 60:pa vs. po P>0.9999, 70:pa vs. po P>0.9999, 80:pa vs. po P>0.9999, 90:pa vs. po P>0.9999, 100:pa vs. po P>0.9999,	F (9, 306) = 0.1736 P=0.9965(genotype), F (1.145, 38.94) = 88.46 P<0.0001(session), F (1, 34) = 0.2343 P=0.6315(interaction),
Fig5D	Mann-Whitney test	18,18	cells/group	mean ± SEM	pa 7.423±1.043 po 7.273±1.001	p>0.9999	U（35）=162
Fig5E	Two-way ANOVA (with Bonferroni's multiple comparisons test)	18,18	cells/group	mean ± SEM	20:1.73 ± 0.08806,1.971 ± 0.1456, 50:1.517 ± 0.06698，1.489 ± 0.03584, 100:1.364 ± 0.05555,1.367 ± 0.05933, 200:1.092 ± 0.02461,1.131 ± 0.03598,	20:pa vs. po P=0.6708, 50:pa vs. po P>0.9999, 100:pa vs. po P>0.9999, 200:pa vs. po P>0.9999,	F (3, 102) = 1.961 P=0.1246(genotype), F (1.761, 59.88) = 50.59 P<0.0001(session) F (1, 34) = 0.7874 P=0.3811(interaction),
Fig5G	Mann-Whitney test	19,21	cells/group	mean ± SEM	pa:0.1411±0.02655,po 0.1438±0.02225,	P=0.8513	U（39）=192
Fig5H	Unpaired t test	14,12	cells/group	mean ± SEM	pa:1.873±0.1685,po 1.857±0.1348,	P=0.9446	t(24)=0.07021
Fig5I	Unpaired t test	13,13	cells/group	mean ± SEM	pa:6.15±0.5325,po 6.587±0.542,	P=0.5707	t(24)=0.5750
Fig5K	Two-way ANOVA (with Bonferroni's multiple comparisons test)	19,18	cells/group	mean ± SEM	10:10.33 ± 2.506,5.763 ± 0.746, 20:12.4 ± 2.618,19.66 ± 7.396, 30:20.65 ± 3.364,44.93 ± 15.32, 40:31.33 ± 4.687,62.91 ± 16.88, 50:49.3 ± 6.888,88.78 ± 17.36, 60:53.54 ± 5.799,113 ± 21.91, 70:73.85 ± 7.752,136.4 ± 23.69, 80:85.08 ± 9.225,162.3 ± 26.27, 90:105.7 ± 10.61,181.4 ± 25.18, 100:109.1 ± 12.37,192.1 ± 22.57,	10:pa vs. po P=0.9495, 20:pa vs. po P>0.9999, 30:pa vs. po P>0.9999, 40:pa vs. po P=0.8682, 50:pa vs. po P=0.4596, 60:pa vs. po P=0.166, 70:pa vs. po P=0.2046, 80:pa vs. po P=0.1133, 90:pa vs. po P=0.1083, 100:pa vs. po P=0.0334,	F (9, 315) = 6.458 P<0.0001(genotype), F (1.376, 48.16) = 73.94 P<0.0001(session), F (1, 35) = 7.412 P=0.0100(interaction),
Fig5L	Mann-Whitney test	19,18	cells/group	mean ± SEM	pa 1.128 ± 0.1189,po 2.082 ± 0.2737,	p=0.004	U（36）=78
Fig5N	Two-way ANOVA (with Bonferroni's multiple comparisons test)	12,16	cells/group	mean ± SEM	Vm=-60:-0.3034 ± 0.04626,-0.3884 ± 0.04779, Vm=-50:-0.3875 ± 0.06117,-0.4343 ± 0.04774, Vm=-40:-0.3505 ± 0.08806,-0.589 ± 0.09002, Vm=-30:-0.3899 ± 0.08999,-0.5872 ± 0.0894, Vm=-20:-0.3546 ± 0.09935,-0.5269 ± 0.1057, Vm=-10:-0.2956 ± 0.1306,-0.4664 ± 0.08324, Vm=0:-0.08957 ± 0.1331,-0.2371 ± 0.09596, Vm=10:0.1152 ± 0.1197,-0.01281 ± 0.1019, Vm=20:0.4305 ± 0.08893,0.3337 ± 0.09405, Vm=30:0.7228 ± …	Vm=-60:pa vs. po P>0.9999, Vm=-50:pa vs. po P>0.9999, Vm=-40:pa vs. po P=0.5548, Vm=-30:pa vs. po P>0.9999, Vm=-20:pa vs. po P>0.9999, Vm=-10:pa vs. po P>0.9999, Vm=0:pa vs. po P>0.9999, Vm=10:pa vs. po P>0.9999, Vm=20:pa vs. po P>0.9999, Vm=30:pa vs. po P>0.9999, Vm=40:pa vs. po P>0.9999,	F (10, 260) = 0.7143 P=0.7108(genotype), F (3.216, 83.62) = 162.1 P<0.0001(session), F (1, 26) = 1.860 P=0.1843(interaction),
Fig5O	Mann-Whitney test	13,20	cells/group	mean ± SEM	pa 5.189±0.48765.087±0.3169,po -0.3884 ± 0.04779,	p=0.9566	U（32）=128
Fig5P	Unpaired t test	13,20	cells/group	mean ± SEM	pa 69.17±8.0574.77±8.269,po -0.4343 ± 0.04774,	p=0.6482	t(31)=0.4607
Fig7B	Two-way ANOVA (with Bonferroni's multiple comparisons test)	19,21	cells/group	mean ± SEM	10:14.384 ± 2.41,11.082 ± 2.067, 20:50.309 ± 10.288,29.828 ± 6.049, 30:112.84 ± 15.574,48.997 ± 8.762, 40:158.268 ± 22.897,77.586 ± 14.132, 50:211.48 ± 27.813,87.141 ± 12.916, 60:268.146 ± 35.903,100.6 ± 13.081, 70:342.093 ± 52.863,122.422 ± 16.375, 80:360.684 ± 43.02,148.724 ± 22.684, 90:431.465 ± 45.261,163.174 ± 26.093, 100:482.197 ± 51.794,182.799 ± 28.684	10:CKO vs. PO,P>0.9999, 20:CKO vs. PO,P=0.9667, 30:CKO vs. PO,P=0.0128, 40:CKO vs. PO,P=0.0537, 50:CKO vs. PO,P=0.0042, 60:CKO vs. PO,P=0.0022, 70:CKO vs. PO,P=0.0068, 80:CKO vs. PO,P=0.0017, 90:CKO vs. PO,P=0.0002, 100:CKO vs. PO,P=0.0002,	F (9, 342) = 15.21 P<0.0001(genotype), F (1.760, 66.87) = 67.28 P<0.0001(session), F (1, 38) = 26.50 P<0.0001(interaction),
Fig7C	Unpaired t test	19,21	cells/group	mean ± SEM	5.101±0.5501, 1.874 ± 0.3276	p<0.0001	t(38)=5.155
Fig7E	Two-way ANOVA (with Bonferroni's multiple comparisons test)	17,17	cells/group	mean ± SEM	20:2.29 ± 0.139,2.596 ± 0.186, 50:1.962 ± 0.106,1.953 ± 0.123, 100:1.601 ± 0.082,1.546 ± 0.08, 200:1.287 ± 0.043,1.153 ± 0.052,	20:CKO vs. PO,P=0.7919, 50:CKO vs. PO,P=>0.9999, 100:CKO vs. PO,P=>0.9999, 200:CKO vs. PO,P=0.2227,	F (9, 342) = 15.21 P<0.0001(genotype), F (1.760, 66.87) = 67.28 P<0.0001(session), F (1, 38) = 26.50 P<0.0001(interaction),
Fig8E	Two-way ANOVA (with Bonferroni's multiple comparisons test)	16,16,11	cells/group	mean ± SEM	10:7.984 ± 1.4,22.74 ± 8.155,2.11 ± 0.7076, 20:14.09 ± 4.37,79.47 ± 26.05,5.724 ± 1.958, 30:23.76 ± 6.128,153 ± 42.93,17.21 ± 7.266, 40:31.39 ± 6.704,222.3 ± 51.5,42.31 ± 18.76, 50:48.54 ± 9.544,282.4 ± 50.85,73.43 ± 34.61, 60:66.51 ± 13.41,304.3 ± 51.32,104.4 ± 54.01, 70:90.54 ± 17.25,349.2 ± 58.52,105 ± 46.56, 80:115.4 ± 20.53,415.6 ± 73.25,122.6 ± 53.32, 90:125.6 ± 24.72,456.9 ± 77.02,132.6 ± …	EGFP vs.BACE1;EGFP vs.△BACE1;BACE1 vs.△BACE1 10:p>0.9999,p=0.0736,p=0.7002, 20:p=0.7504,p>0.9999,p=0.3825, 30:p=0.2703,p>0.9999,p=0.2, 40:p=0.0642,p>0.9999,p=0.1187, 50:p=0.0104,p>0.9999,p=0.0704, 60:p=0.0098,p>0.9999,p=0.3946, 70:p=0.0155,p>0.9999,p=0.095, 80:p=0.0302,p>0.9999,p=0.1034, 90:p=0.0202,p>0.9999,p=0.0579, 100:p=0.0452,p>0.9999,p=0.0658,	F (18, 360) = 7.741 P<0.0001(genotype), F (1.147, 45.89) = 40.64 P<0.0001(session), F (2, 40) = 11.83 P<0.0001(interaction),
Fig8F	Kruskal-Wallis test	16,16,11	cells/group	mean ± SEM	egfp 1.516 ± 0.2962,bace1-egfp 5.319 ± 0.9042,Dbace1-egfp 1.763 ± 0.7064,	EGFP vs. BACE1 p=0.0064 EGFP vs. △BACE1 p>0.9999 BACE1 vs. △BACE1 p=0.0054	U（42）=13.22
FPO-FO-IO	Two-way ANOVA (with Bonferroni's multiple comparisons test)	13,16	cells/group	mean ± SEM	10:0.7523 ± 0.4005,0.9043 ± 0.6681, 20:4.061 ± 0.912,10.02 ± 1.684, 30:10.53 ± 2.163,23.86 ± 3.04, 40:23.84 ± 2.992,81.75 ± 14.09, 50:61.83 ± 8.934,182.6 ± 29.71, 60:114.2 ± 19.12,278.1 ± 36.84, 70:158.1 ± 27.57,379.2 ± 51.92, 80:236.2 ± 40.83,488.1 ± 66.71, 90:272.2 ± 46.39,581.1 ± 79.23, 100:309.3 ± 48.57,701.6 ± 98.37	10:FO vs. FPO,p>0.9999, 20:FO vs. FPO,p=0.0499, 30:FO vs. FPO,p=0.0142, 40:FO vs. FPO,p=0.0095, 50:FO vs. FPO,p=0.011, 60:FO vs. FPO,p=0.0068, 70:FO vs. FPO,p=0.0105, 80:FO vs. FPO,p=0.0364, 90:FO vs. FPO,p=0.0262, 100:FO vs. FPO,p=0.0172,	F (9, 243) = 9.310 P<0.0001(genotype), F (1.173, 31.68) = 68.42 P<0.0001(session), F (1, 27) = 12.23 P=0.0016(interaction),
FPO-FO-IO-SLOPE	Unpaired t test (with Welch's correction)	13,16	cells/group	mean ± SEM	FO:4.195 ± 0.697,FPO:0.697 ± 1.281	FO vs. FPO p=0.0026	t(22.71)=3.378
FPO-FO-PPR	Two-way ANOVA (with Bonferroni's multiple comparisons test)	13,18	cells/group	mean ± SEM	20:3.166 ± 0.2437,2.645 ± 0.1703, 50:2.252 ± 0.1451,2.358 ± 0.1415, 100:1.934 ± 0.08494,1.884 ± 0.1324, 200:1.299 ± 0.04387,1.181 ± 0.02892	20:FO vs. FPO,p=0.3734, 50:FO vs. FPO,p>0.9999, 100:FO vs. FPO,p>0.9999, 200:FO vs. FPO,p=0.1423,	F (3, 87) = 2.437 P=0.07(genotype), F (2.401, 69.63) = 66.71 P<0.0001(session), F (1, 29) = 1.206 P=0.2811(interaction),
FPO-RESCUE-IO	Two-way ANOVA (with Bonferroni's multiple comparisons test)	16,16	cells/group	mean ± SEM	10:45.98 ± 7.283,21.57 ± 6.93, 20:202.5 ± 49.15,80.99 ± 33.92, 30:385 ± 76.22,158.7 ± 60.74, 40:560.1 ± 101.3,220.1 ± 77.34, 50:671.4 ± 106,282.5 ± 89.92, 60:794 ± 112.5,317 ± 91.57, 70:909.6 ± 112.7,367.5 ± 90.1, 80:968.8 ± 114.6,408.9 ± 87.53, 90:1042 ± 117.8,446.2 ± 84.04, 100:1065 ± 110.6,490.1 ± 83.92	10:eGFP vs. BACE1-eGFP,p=0.2139, 20:eGFP vs. BACE1-eGFP,p=0.5189, 30:eGFP vs. BACE1-eGFP,p=0.2756, 40:eGFP vs. BACE1-eGFP,p=0.1253, 50:eGFP vs. BACE1-eGFP,p=0.0901, 60:eGFP vs. BACE1-eGFP,p=0.0267, 70:eGFP vs. BACE1-eGFP,p=0.0078, 80:eGFP vs. BACE1-eGFP,p=0.0057, 90:eGFP vs. BACE1-eGFP,p=0.0032, 100:eGFP vs. BACE1-eGFP,p=0.0028,	F (9, 270) = 11.84 P<0.0001(genotype), F (1.106, 33.19) = 76.22 P<0.0001(session), F (1, 30) = 12.34 P=0.0014(interaction),
FPO-RESCUE- IO-SLOPE	Unpaired t test	16,16	cells/group	mean ± SEM	egfp 11.72 ± 1.246,bace1-egfp 5.126 ± 0.9229	EGFP vs. BACE1 p=0.0001	U（31）=32
PA-CKO-PN-AMPAR	Two-way ANOVA (with Bonferroni's multiple comparisons test)	6,7	cells/group	mean ± SEM	10:6.409 ± 4.263,19.19 ± 8.903, 20:32.5 ± 13.89,45.72 ± 19.66, 30:74.25 ± 27.24,77.56 ± 24.01, 40:115.7 ± 32.82,110 ± 28.4, 50:156.6 ± 42.86,132.5 ± 29.58, 60:190.9 ± 52.3,161.9 ± 35.61, 70:229 ± 56.22,173.5 ± 29.33, 80:245.9 ± 56.68,210.8 ± 26.16, 90:273.3 ± 64.12,253.8 ± 42.38, 100:303.3 ± 69.67,291.3 ± 51.62,	10:PA vs. CKO,P>0.9999, 20:PA vs. CKO,P>0.9999, 30:PA vs. CKO,P>0.9999, 40:PA vs. CKO,P>0.9999, 50:PA vs. CKO,P>0.9999, 60:PA vs. CKO,P>0.9999, 70:PA vs. CKO,P>0.9999, 80:PA vs. CKO,P>0.9999, 90:PA vs. CKO,P>0.9999,	F (9, 99) = 0.6190 P=0.7783(genotype), F (1.121, 12.33) = 46.58 P<0.0001(session), F (1, 11) = 0.09862 P=0.7594(interaction),
